# Supplementary figures and images for: Spin-crossover iron(ii) complex showing thermal hysteresis around room temperature with symmetry breaking and an unusually highT(LIESST) of 120 K
Source: Royal Society of Chemistry journal article supplement (doi:10.1039/c9cc05988a), 2019-01-01

VG180 24-09-2018\_240\_300a 11:56:19 28/9/18

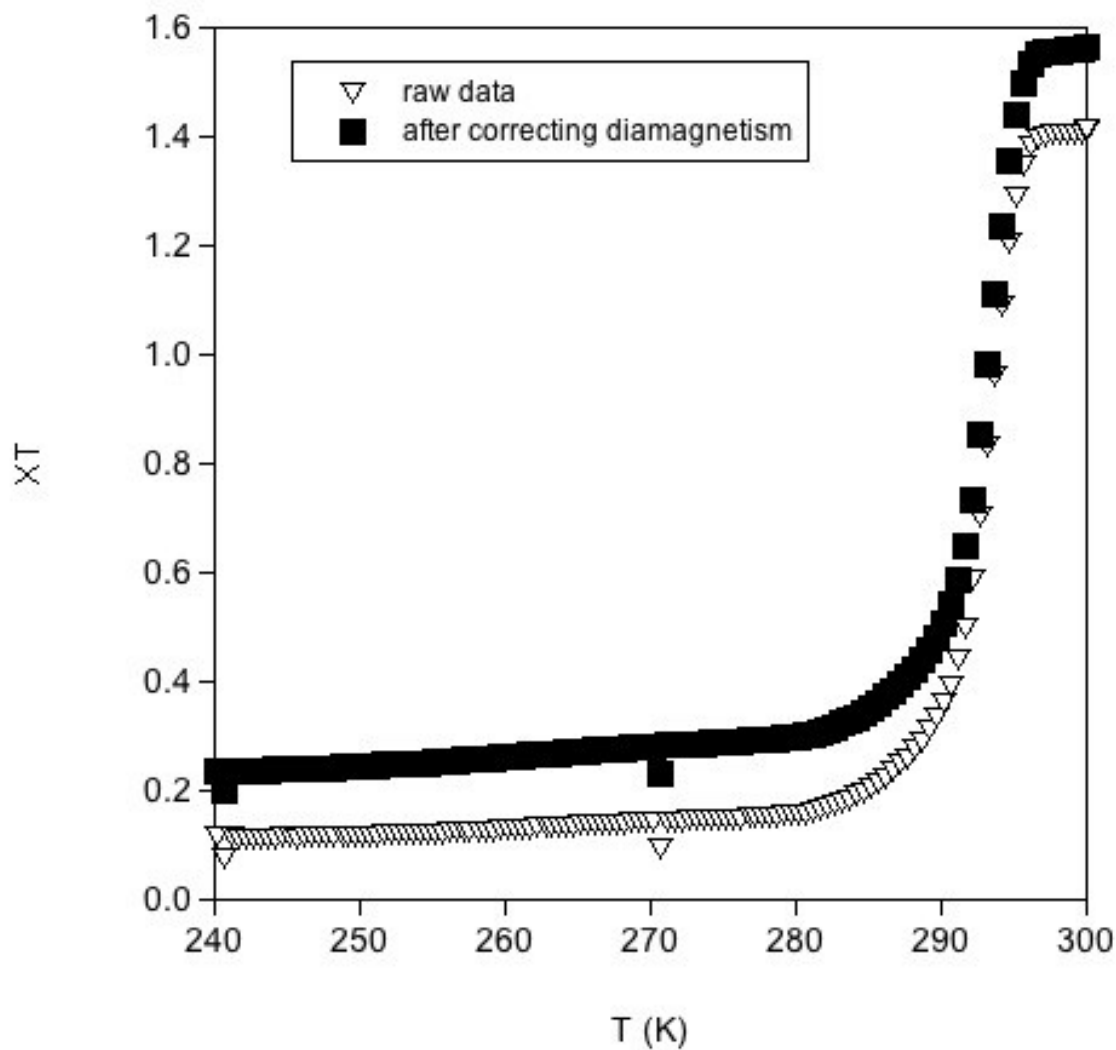

Supplement: c9cc05988a2.pdf [file c9cc05988a2.pdf]
